# Supplementary material for: Synthesis of cobalt cluster-based supramolecular triple-stranded helicates
Source: Royal Society of Chemistry journal article supplement (doi:10.1039/c5dt01895a), 2015-01-01
Supplement: c5dt01895a1.pdf [file c5dt01895a1.pdf]

*Supporting Information for*

# **Synthesis of Cobalt Cluster-based Supramolecular Triple-Stranded Helicates**

*Hyojong Yoo<sup>a\*</sup> Jeonghee Lee,<sup>a</sup> Philjae Kang,<sup>b</sup> Moon-Gun Choi<sup>b</sup>*

<sup>a</sup> Department of Chemistry, Hallym University, Chuncheon, Gangwon-do, 200-702, Republic of Korea

<sup>b</sup> Department of Chemistry, Yonsei University, Seoul, 120-749, Republic of Korea

\*Corresponding author.

E-mail address: [hyojong@hallym.ac.kr](mailto:hyojong@hallym.ac.kr) (H. Yoo).

**General Methods** All glassware was oven-dried prior to use.  $^1\text{H}$  NMR spectra were obtained at 300 MHz FT-NMR Varian Mercury spectrometer at 303 K.  $^1\text{H}$  chemical shifts are reported relative to tetramethylsilane. IR spectra of the complexes were recorded in the 399–4000  $\text{cm}^{-1}$  range using KBr pellets on a FT/IR-4200 JASCO spectrometer. Thermogravimetric analysis (TGA) was performed on a TA Instruments SDT Q600 analyzer under a nitrogen atmosphere from 18 to 600  $^{\circ}\text{C}$  at a heating rate of 2  $^{\circ}\text{C}/\text{min}$ . Powder X-ray diffraction (PXRD) analysis was performed on a RIGAKU Ultima IV diffractometer using  $\text{Cu K}\alpha$  radiation (wavelength 1.541  $\text{\AA}$ ) in focused beam configuration with a continuous scan rate of 4 $^{\circ}$   $\text{min}^{-1}$  in the 3–80 $^{\circ}$  range. Simulated PXRD patterns were calculated from single crystal X-ray diffraction data using the Mercury 3.3 program. Ultraviolet-visible-near infrared (UV-vis-NIR) spectra were recorded on a UV-3200 Shimadzu spectrophotometer. Elemental analyses were performed on a Thermo Finnigan Flash EA1112 unit. Circular dichroism (CD) analysis was performed on a J-815 JASCO spectrometer.

**Materials** Cobalt(II) nitrate hexahydrate ( $\text{Co}(\text{NO}_3)_2 \cdot 6\text{H}_2\text{O}$ , 98 %, Sigma-Aldrich), cobalt(II) acetate tetrahydrate ( $\text{Co}(\text{OAc})_2 \cdot 4\text{H}_2\text{O}$ ,  $\geq 98$  %, Sigma-Aldrich), 2,6-pyridinedicarboxylic acid ( $\text{C}_7\text{H}_5\text{NO}_4$ , 99%, Sigma-Aldrich), benzene-1,3-dicarboxylic acid ( $\text{C}_8\text{H}_6\text{O}_4$ , 99%, Sigma-Aldrich), N,N-dimethylformamide (DMF, 99.99%, Burdick & Jackson), dimethyl sulfoxide (DMSO, 99.0%, Samchun), and HCl (extra pure, Burdick & Jackson) were used as received.  $\text{CDCl}_3$  (99.8%, +0.05% TMS, Cambridge Isotope Laboratories, Inc.) and  $\text{DMSO-d}_6$  (99.9%, Cambridge Isotope Laboratories, Inc.) were used as received. Abbreviations used: OAc = acetate, PDA = 2,6-pyridinedicarboxylate,  $\text{H}_2\text{PDA}$  = 2,6-pyridinedicarboxylic acid, PTA = benzene-1,3-

dicarboxylate (common name: isophthalate), H<sub>2</sub>PTA = benzene-1,3-dicarboxylic acid (common name: isophthalic acid).

**Synthesis of Co<sub>8</sub>(PDA)<sub>6</sub>(PTA)<sub>3</sub>(DMF)<sub>3</sub>(H<sub>2</sub>O)<sub>3</sub> (1)** Co(NO<sub>3</sub>)<sub>2</sub>·6H<sub>2</sub>O (11.64 mg, 0.04 mmol), H<sub>2</sub>PDA (3.34 mg, 0.02 mmol), H<sub>2</sub>PTA (3.32 mg, 0.02 mmol), HCl (0.1mL, 0.01mmol), and DMF (1.599 mL, 20.8 mmol) were mixed in a vial at room temperature. The vial was sealed tightly, and heated to 120 °C in an oven. Crystals began to form after 3 h at 120 °C. To reach completion, the reaction mixture was kept at 120 °C for 48 h, and then cooled to room temperature. Purple needle-shaped crystals were collected, washed with DMF (3 × 4 mL) and acetone (2 × 2 mL), and dried; the yield was 48.7 % (crystals yield; based on the amount of H<sub>2</sub>PDA used). Strong absorption bands in the FT-IR spectrum of **1** at ~3379 cm<sup>-1</sup> are attributed to ν(O-H); a peak at ~1622 cm<sup>-1</sup> corresponds to the deformation vibration of the water molecules. Bands between 3300 and 2700 cm<sup>-1</sup> appear bands (2933, 2805 cm<sup>-1</sup>) corresponds to ν(C-H)s. Anal. Calcd. for C<sub>75</sub>H<sub>57</sub>Co<sub>8</sub>N<sub>9</sub>O<sub>42</sub>·3DMF·H<sub>2</sub>O: C, 40.93; H, 3.33; N, 6.82, Found: C, 40.83; H, 3.32; N, 7.08

**Synthesis of [Co<sub>8</sub>(PDA)<sub>6</sub>(PTA)<sub>3</sub>(DMF)<sub>2</sub>(H<sub>2</sub>O)<sub>4</sub>-0.51(Co(OH)<sub>n</sub>)<sub>2</sub>] (2)** Co(OAc)<sub>2</sub>·4H<sub>2</sub>O (37.4 mg, 0.15 mmol), H<sub>2</sub>PDA (10.0 mg, 0.06 mmol), H<sub>2</sub>PTA (5 mg, 0.03 mmol), DMSO (0.1mL, 1.4 mmol), and DMF (2.4 mL, 31.2 mmol) were mixed in a vial at room temperature. The vial was sealed tightly and then heated to 120°C (increasing rate; 3°C/min). Crystals began to form after 3 h at 120 °C. To reach completion, the reaction mixture was kept at 120 °C for 48 h, and then cooled to room temperature. Purple needle-shaped crystals were collected, washed with DMF (3 × 4 mL), acetone (2 × 2 mL) and dried; the yield was 44.5 % (crystals yield; based on H<sub>2</sub>PDA

used). Anal. Calcd. for  $C_{72}H_{52}Co_{8.52}N_8O_{43} \cdot 3DMF$ : C, 39.89; H, 3.02; N, 6.32, Found: C, 40.048; H, 2.2889; N, 6.169.

**Single crystal X-ray diffraction analysis of  $Co_8(PDA)_6(PTA)_3(DMF)_3(H_2O)_3$  (1)** A specimen of suitable size and quality was coated with Paratone oil and mounted on a MiTeGen MicroMount©. Reflection data were collected on a Bruker D8 Venture PHOTON 100 area detector diffractometer, with Cu  $K_\alpha$  radiation ( $\lambda = 1.54178 \text{ \AA}$ ). The full sphere of reflection data was collected as  $\omega$  and  $\phi$  scan frames at  $1^\circ/\text{frame}$  and an exposure time of 30 s/frame. Cell parameters were determined and refined by the APEX2 program.<sup>1</sup> Data reduction was performed using the SAINT software.<sup>2</sup> The data were corrected for Lorentz and polarization effects. Empirical absorption correction was applied using the SADABS program.<sup>3</sup> The structure was solved by direct methods and all nonhydrogen atoms were subjected to anisotropic refinement by full-matrix least-squares on  $F^2$  using the SHELXTL and Olex 2 GUI program.<sup>4</sup> Hydrogen atoms were placed at their geometrically calculated positions and refined riding on the corresponding carbon atoms with isotropic thermal parameters. The voids contained disordered DMF with a partial occupancy. A satisfactory disorder model for the solvent was not found, therefore the Olex2 Solvent Mask routine was used to mask out the disordered density. The masked electron density of 156.3 e<sup>-</sup> per unit cell could be interpreted as 4 DMFs (160 e<sup>-</sup>). One of PDA ligands (C30-C36) was found to be disordered and was modeled in two different orientations using the restraints of RIGU, FLAT and ISOR. The partial occupancy of both orientations was fixed to 0.5. The substitutionally disordered solvent molecules (water, DMF), which are coordinated to Co4 were treated with a partial occupancy of 0.5.

**Single crystal X-ray diffraction analysis of  $[\text{Co}_8(\text{PDA})_6(\text{PTA})_3(\text{DMF})_2(\text{H}_2\text{O})_4-0.51(\text{Co}(\text{OH}_n)_2)]$**  A specimen of suitable size and quality was coated with Paratone oil and mounted on a MiTeGen MicroMount©. Reflection data were collected on a Bruker D8 Venture PHOTON 100 area detector diffractometer, with Cu  $K_\alpha$  radiation ( $\lambda = 1.54178 \text{ \AA}$ ). The full sphere of reflection data was collected as  $\omega$  and  $\phi$  scan frames with  $1^\circ/\text{frame}$  and an exposure time of 20 s/frame. Cell parameters were determined and refined by the APEX2 program.<sup>1</sup> Data reduction was performed using SAINT software.<sup>2</sup> The data were corrected for Lorentz and polarization effects. An empirical absorption correction was applied using the SADABS program.<sup>3</sup> The structure was solved by direct methods, and all nonhydrogen atoms were subjected to anisotropic refinement by full-matrix least-squares on  $F^2$  using the SHELXTL and Olex 2 GUI program.<sup>4</sup> Hydrogen atoms were placed at their geometrically calculated positions and refined riding on the corresponding carbon atoms with isotropic thermal parameters. Co5 has non-stoichiometric occupancy (0.51). The voids contained disordered DMF with a partial occupancy. A satisfactory disorder model for the solvent was not found, and therefore the Olex2 Solvent Mask routine was used to mask out disordered density. The masked electron density of  $329.5 \text{ e}^-$  per unit cell could be interpreted as 8 DMF ( $320 \text{ e}^-$ ). The restrain of ISOR was used to treat the disordered atoms of C32, C33, O19, and C40. The solvent molecules (DMF,  $\text{H}_2\text{O}$ ), which were coordinated to Co4 were extremely disordered and modeled in two different orientation with fixed partial occupancy of 0.5. Although high electron density on the outer side of the O(20) and O(20A) was observed, further treatments for disordered DMF molecules were unsuccessful.

**Table S1.** Crystallographic Data for  $\text{Co}_8(\text{PDA})_6(\text{PTA})_3(\text{DMF})_3(\text{H}_2\text{O})_3$ , **1** and  $[\text{Co}_8(\text{PDA})_6(\text{PTA})_3(\text{DMF})_2(\text{H}_2\text{O})_4-0.51(\text{Co}(\text{OH})_2)]$ , **2**.

|                                             | <b>1</b>                                                       | <b>2</b>                                                                       |
|---------------------------------------------|----------------------------------------------------------------|--------------------------------------------------------------------------------|
| Empirical formula                           | $\text{C}_{72}\text{H}_{57}\text{Co}_8\text{N}_9\text{O}_{42}$ | $\text{C}_{76.28}\text{H}_{62}\text{Co}_{8.51}\text{N}_{9.43}\text{O}_{44.45}$ |
| Formula weight                              | 2227.73                                                        | 2323.66                                                                        |
| Temperature/K                               | 120.0                                                          | 100.0                                                                          |
| Crystal system                              | Trigonal                                                       | trigonal                                                                       |
| Space group                                 | $\text{P3}_121$                                                | $\text{P3}_121$                                                                |
| a/Å                                         | 23.945(2)                                                      | 23.9077(5)                                                                     |
| b/Å                                         | 23.945(2)                                                      | 23.9077(5)                                                                     |
| c/Å                                         | 17.1792(16)                                                    | 17.2642(5)                                                                     |
| $\alpha/^\circ$                             | 90                                                             | 90                                                                             |
| $\beta/^\circ$                              | 90                                                             | 90                                                                             |
| $\gamma/^\circ$                             | 120                                                            | 120                                                                            |
| Volume/Å <sup>3</sup>                       | 8530.6(18)                                                     | 8545.8(4)                                                                      |
| Z                                           | 3                                                              | 3                                                                              |
| $\rho_{\text{calc}}/\text{mg}/\text{mm}^3$  | 1.301                                                          | 1.355                                                                          |
| $\text{m}/\text{mm}^{-1}$                   | 1.212                                                          | 10.158                                                                         |
| F(000)                                      | 3366.0                                                         | 3514.0                                                                         |
| Crystal size/ $\text{mm}^3$                 | $0.41 \times 0.091 \times 0.066$                               | $0.2 \times 0.1 \times 0.1$                                                    |
| Radiation                                   | $\text{MoK}\alpha$ ( $\lambda = 0.71073$ )                     | $\text{CuK}\alpha$ ( $\lambda = 1.54178$ )                                     |
| 2 $\theta$ range for data collection        | 5.838 to 50.968                                                | 6.666 to 145.148                                                               |
| Index ranges                                | $-28 \leq h \leq 28, -28 \leq k \leq 28, -20 \leq l \leq 20$   | $-29 \leq h \leq 29, -29 \leq k \leq 29, -21 \leq l \leq 20$                   |
| Reflections collected                       | 78659                                                          | 147932                                                                         |
| Independent reflections                     | 10527<br>[R(int) = 0.0799, R(sigma)=0.0408]                    | 11216<br>[R(int) = 0.1243, R(sigma) = 0.0546]                                  |
| Data/restraints/parameters                  | 10527/810/679                                                  | 11216/297/663                                                                  |
| Goodness-of-fit on F <sup>2</sup>           | 1.082                                                          | 1.095                                                                          |
| Final R indexes [ $I \geq 2\sigma(I)$ ]     | $R_1 = 0.0578, wR_2 = 0.1562$                                  | $R_1 = 0.0729, wR_2 = 0.2014$                                                  |
| Final R indexes [all data]                  | $R_1 = 0.0760, wR_2 = 0.1700$                                  | $R_1 = 0.0830, wR_2 = 0.2107$                                                  |
| Largest diff. peak/hole / e Å <sup>-3</sup> | 0.71/-0.46                                                     | 1.38/-0.61                                                                     |
| Flack parameter                             | -0.008(6)                                                      | 0.013(3)                                                                       |

**Table S2.** Bond Distances (Å) in Co<sub>8</sub>(PDA)<sub>6</sub>(PTA)<sub>3</sub>(DMF)<sub>3</sub>(H<sub>2</sub>O)<sub>3</sub>, **1**<sup>a</sup>

|                      |           |         |           |
|----------------------|-----------|---------|-----------|
| Co1-O1               | 2.128(6)  | O22-C40 | 1.20(4)   |
| Co1-O5               | 2.086(6)  | N1-C1   | 1.333(11) |
| Co1-O9               | 2.116(6)  | N1-C5   | 1.316(11) |
| Co1-O13              | 2.029(6)  | N2-C8   | 1.312(12) |
| Co1-O15 <sup>1</sup> | 2.038(6)  | N2-C12  | 1.342(11) |
| Co1-O17A             | 2.11(2)   | N3-C15  | 1.321(14) |
| Co2-O1               | 2.286(6)  | N3-C19  | 1.385(13) |
| Co2-O3               | 2.106(6)  | N4-C37  | 1.275(13) |
| Co2-O10              | 2.109(7)  | N4-C38  | 1.454(13) |
| Co2-O16 <sup>1</sup> | 2.035(6)  | N4-C39  | 1.438(14) |
| Co2-O20              | 2.146(6)  | N5-C40  | 1.46(4)   |
| Co2-N1               | 2.063(7)  | N5-C41  | 1.15(3)   |
| Co3-O2               | 2.085(6)  | N5-C42  | 1.51(4)   |
| Co3-O5               | 2.248(6)  | C1-C2   | 1.374(13) |
| Co3-O7               | 2.111(6)  | C1-C6   | 1.494(13) |
| Co3-O14              | 1.999(6)  | C2-C3   | 1.348(14) |
| Co3-O19              | 2.128(8)  | C3-C4   | 1.420(14) |
| Co3-N2               | 2.062(7)  | C4-C5   | 1.358(13) |
| Co4-O6               | 2.118(7)  | C5-C7   | 1.490(13) |
| Co4-O9               | 2.238(7)  | C8-C9   | 1.389(12) |
| Co4-O11              | 2.138(8)  | C8-C13  | 1.492(12) |
| Co4-O18A             | 2.09(2)   | C9-C10  | 1.403(14) |
| Co4-O21              | 2.14(2)   | C10-C11 | 1.344(13) |
| Co4-O22              | 2.03(2)   | C11-C12 | 1.390(12) |
| Co4-N3               | 2.022(9)  | C12-C14 | 1.503(13) |
| O1-C6                | 1.255(10) | C15-C16 | 1.363(14) |
| O2-C6                | 1.290(10) | C15-C20 | 1.498(14) |
| O3-C7                | 1.275(11) | C16-C17 | 1.367(17) |
| O4-C7                | 1.249(11) | C17-C18 | 1.375(18) |
| O5-C13               | 1.301(11) | C18-C19 | 1.334(15) |
| O6-C13               | 1.231(11) | C19-C21 | 1.506(18) |
| O7-C14               | 1.262(10) | C22-C23 | 1.375(12) |
| O8-C14               | 1.241(11) | C22-C27 | 1.395(13) |
| O9-C20               | 1.276(11) | C22-C28 | 1.508(12) |
| O10-C20              | 1.247(12) | C23-C24 | 1.406(12) |
| O11-C21              | 1.236(14) | C24-C25 | 1.385(12) |
| O12-C21              | 1.193(16) | C24-C29 | 1.500(11) |
| O13-C28              | 1.242(10) | C25-C26 | 1.385(12) |
| O14-C28              | 1.258(10) | C26-C27 | 1.373(13) |
| O15-Co1 <sup>1</sup> | 2.038(6)  | C30-C31 | 1.39      |
| O15-C29              | 1.245(10) | C30-C35 | 1.39      |

|                      |           |          |         |
|----------------------|-----------|----------|---------|
| O16-Co2 <sup>1</sup> | 2.035(6)  | C30-C36A | 1.47(3) |
| O16-C29              | 1.252(11) | C31-C32  | 1.39    |
| O17-C36              | 1.13(4)   | C32-C33  | 1.39    |
| O17A-C36A            | 1.38(4)   | C33-C34  | 1.39    |
| O18-C36              | 1.30(4)   | C34-C35  | 1.39    |
| O18A-C36A            | 1.27(3)   | C34-C36  | 1.51(3) |
| O20-C37              | 1.236(11) |          |         |

---

<sup>1</sup>1-Y+X,2-Y,2/3-Z; <sup>2</sup>+Y,+X,-Z

<sup>a</sup> Numbers in parentheses are estimated standard deviations in the least significant digits.

<sup>b</sup> “A” show the atoms from disordered phenyl groups.



**Table S3.** Bond Angles (deg) in Co<sub>8</sub>(PDA)<sub>6</sub>(PTA)<sub>3</sub>(DMF)<sub>3</sub>(H<sub>2</sub>O)<sub>3</sub>, **1**<sup>a</sup>

|               |          |             |           |
|---------------|----------|-------------|-----------|
| O5-Co1-O1     | 89.2(2)  | C8-N2-C12   | 122.4(8)  |
| O5-Co1-O9     | 88.0(2)  | C12-N2-Co3  | 116.5(6)  |
| O5-Co1-O17A   | 97.8(8)  | C15-N3-Co4  | 122.5(7)  |
| O9-Co1-O1     | 88.3(2)  | C15-N3-C19  | 118.2(9)  |
| O13-Co1-O1    | 96.1(2)  | C19-N3-Co4  | 119.2(7)  |
| O13-Co1-O5    | 90.2(2)  | C37-N4-C38  | 120.1(8)  |
| O13-Co1-O9    | 175.2(3) | C37-N4-C39  | 124.6(9)  |
| O13-Co1-O151  | 88.3(2)  | C39-N4-C38  | 115.3(9)  |
| O13-Co1-O17A  | 85.2(6)  | C40-N5-C42  | 117(2)    |
| O151-Co1-O1   | 86.7(2)  | C41-N5-C40  | 119(3)    |
| O151-Co1-O5   | 175.5(3) | C41-N5-C42  | 120(3)    |
| O151-Co1-O9   | 93.9(2)  | N1-C1-C2    | 121.3(9)  |
| O151-Co1-O17A | 86.3(7)  | N1-C1-C6    | 112.8(8)  |
| O17A-Co1-O1   | 172.8(8) | C2-C1-C6    | 125.9(9)  |
| O17A-Co1-O9   | 90.7(6)  | C3-C2-C1    | 119.4(10) |
| O3-Co2-O1     | 150.0(2) | C2-C3-C4    | 118.4(9)  |
| O3-Co2-O10    | 93.8(3)  | C5-C4-C3    | 118.7(9)  |
| O3-Co2-O20    | 91.1(3)  | N1-C5-C4    | 121.4(9)  |
| O10-Co2-O1    | 85.1(2)  | N1-C5-C7    | 112.8(8)  |
| O10-Co2-O20   | 175.1(2) | C4-C5-C7    | 125.6(8)  |
| O161-Co2-O1   | 112.4(2) | O1-C6-O2    | 123.9(8)  |
| O161-Co2-O3   | 97.6(3)  | O1-C6-C1    | 118.5(8)  |
| O161-Co2-O10  | 88.1(3)  | O2-C6-C1    | 117.4(8)  |
| O161-Co2-O20  | 91.1(2)  | O3-C7-C5    | 116.7(8)  |
| O161-Co2-N1   | 172.8(3) | O4-C7-O3    | 124.3(9)  |
| O20-Co2-O1    | 90.8(2)  | O4-C7-C5    | 119.0(8)  |
| N1-Co2-O1     | 73.7(2)  | N2-C8-C9    | 119.7(8)  |
| N1-Co2-O3     | 76.3(3)  | N2-C8-C13   | 114.7(8)  |
| N1-Co2-O10    | 88.5(3)  | C9-C8-C13   | 125.5(8)  |
| N1-Co2-O20    | 92.8(3)  | C8-C9-C10   | 118.8(9)  |
| O2-Co3-O5     | 88.9(2)  | C11-C10-C9  | 119.8(9)  |
| O2-Co3-O7     | 89.4(3)  | C10-C11-C12 | 119.3(9)  |
| O2-Co3-O19    | 176.3(3) | N2-C12-C11  | 119.9(8)  |
| O7-Co3-O5     | 151.1(2) | N2-C12-C14  | 113.0(7)  |
| O7-Co3-O19    | 92.9(3)  | C11-C12-C14 | 127.0(8)  |
| O14-Co3-O2    | 90.0(3)  | O5-C13-C8   | 115.4(8)  |
| O14-Co3-O5    | 107.8(2) | O6-C13-O5   | 126.6(8)  |

|              |          |              |           |
|--------------|----------|--------------|-----------|
| O14-Co3-O7   | 101.0(2) | O6-C13-C8    | 118.0(8)  |
| O14-Co3-O19  | 86.7(3)  | O7-C14-C12   | 117.3(8)  |
| O14-Co3-N2   | 174.3(3) | O8-C14-O7    | 126.1(9)  |
| O19-Co3-O5   | 90.5(3)  | O8-C14-C12   | 116.5(8)  |
| N2-Co3-O2    | 95.5(3)  | N3-C15-C16   | 121.0(10) |
| N2-Co3-O5    | 74.1(3)  | N3-C15-C20   | 112.4(8)  |
| N2-Co3-O7    | 77.4(3)  | C16-C15-C20  | 126.6(10) |
| N2-Co3-O19   | 87.9(3)  | C15-C16-C17  | 119.4(12) |
| O6-Co4-O9    | 86.5(2)  | C16-C17-C18  | 121.0(11) |
| O6-Co4-O11   | 91.0(3)  | C19-C18-C17  | 116.7(12) |
| O6-Co4-O21   | 172.2(5) | N3-C19-C21   | 110.9(10) |
| O11-Co4-O9   | 149.6(3) | C18-C19-N3   | 123.4(11) |
| O11-Co4-O21  | 95.9(6)  | C18-C19-C21  | 125.6(11) |
| O18A-Co4-O6  | 81.5(6)  | O9-C20-C15   | 116.7(9)  |
| O18A-Co4-O9  | 116.5(6) | O10-C20-O9   | 126.1(9)  |
| O18A-Co4-O11 | 93.1(6)  | O10-C20-C15  | 117.2(8)  |
| O21-Co4-O9   | 85.7(5)  | O11-C21-C19  | 115.9(11) |
| O22-Co4-O6   | 172.8(6) | O12-C21-O11  | 127.2(14) |
| O22-Co4-O9   | 100.5(6) | O12-C21-C19  | 116.9(12) |
| O22-Co4-O11  | 82.1(6)  | C23-C22-C27  | 119.4(8)  |
| O22-Co4-O18A | 96.8(9)  | C23-C22-C28  | 120.7(8)  |
| N3-Co4-O6    | 90.8(3)  | C27-C22-C28  | 119.8(8)  |
| N3-Co4-O9    | 74.2(3)  | C22-C23-C24  | 121.2(8)  |
| N3-Co4-O11   | 75.5(3)  | C23-C24-C29  | 119.8(8)  |
| N3-Co4-O18A  | 166.1(6) | C25-C24-C23  | 118.1(8)  |
| N3-Co4-O21   | 87.5(7)  | C25-C24-C29  | 122.0(8)  |
| N3-Co4-O22   | 89.4(7)  | C26-C25-C24  | 120.6(8)  |
| Co1-O1-Co2   | 104.0(2) | C27-C26-C25  | 120.6(8)  |
| C6-O1-Co1    | 137.6(6) | C26-C27-C22  | 119.9(8)  |
| C6-O1-Co2    | 113.3(5) | O13-C28-O14  | 125.5(8)  |
| C6-O2-Co3    | 128.7(6) | O13-C28-C22  | 117.7(7)  |
| C7-O3-Co2    | 116.0(6) | O14-C28-C22  | 116.8(8)  |
| Co1-O5-Co3   | 106.9(3) | O15-C29-O16  | 126.2(8)  |
| C13-O5-Co1   | 136.4(6) | O15-C29-C24  | 117.0(8)  |
| C13-O5-Co3   | 114.6(5) | O16-C29-C24  | 116.8(8)  |
| C13-O6-Co4   | 128.8(6) | C31-C30-C35  | 120       |
| C14-O7-Co3   | 115.6(6) | C31-C30-C36A | 116.1(16) |
| Co1-O9-Co4   | 105.6(3) | C35-C30-C36A | 121.0(16) |
| C20-O9-Co1   | 136.5(6) | C30-C31-C32  | 120       |

|               |           |                |           |
|---------------|-----------|----------------|-----------|
| C20-O9-Co4    | 114.2(6)  | C31-C32-C33    | 120       |
| C20-O10-Co2   | 126.2(6)  | C34-C33-C32    | 120       |
| C21-O11-Co4   | 118.0(8)  | C33-C34-C36    | 120.0(17) |
| C28-O13-Co1   | 137.0(6)  | C35-C34-C33    | 120       |
| C28-O14-Co3   | 121.2(6)  | C35-C34-C36    | 118.8(18) |
| C29-O15-Co11  | 131.3(6)  | C34-C35-C30    | 120       |
| C29-O16-Co21  | 113.0(5)  | O17-C36-O18    | 110(3)    |
| C36A-O17A-Co1 | 122(2)    | O17-C36-C34    | 133(3)    |
| C36A-O18A-Co4 | 107.2(18) | O18-C36-C34    | 116(3)    |
| C37-O20-Co2   | 126.1(6)  | O17A-C36A-C30  | 109(2)    |
| C40-O22-Co4   | 129(2)    | O18A-C36A-O17A | 136(3)    |
| C1-N1-Co2     | 121.4(6)  | O18A-C36A-C30  | 115(2)    |
| C5-N1-Co2     | 118.1(6)  | O20-C37-N4     | 128.9(10) |
| C5-N1-C1      | 120.4(8)  | O22-C40-N5     | 119(3)    |
| C8-N2-Co3     | 120.8(6)  |                |           |

---

<sup>1</sup>1-Y+X,2-Y,2/3-Z; <sup>2</sup>+Y,+X,-Z

<sup>a</sup> Numbers in parentheses are estimated standard deviations in the least significant digits.

<sup>b</sup> “A” show the atoms from disordered phenyl groups.

**Table S4.** Bond Distances (Å) in  $[\text{Co}_8(\text{PDA})_6(\text{PTA})_3(\text{DMF})_2(\text{H}_2\text{O})_4-0.51(\text{Co}(\text{OH}_n)_2)]$ , **2**<sup>a</sup>

|                      |           |                      |           |
|----------------------|-----------|----------------------|-----------|
| Co1-O1               | 2.138(6)  | N1-C1                | 1.344(11) |
| Co1-O5               | 2.154(6)  | N1-C5                | 1.332(11) |
| Co1-O9               | 2.102(6)  | N2-C8                | 1.331(13) |
| Co1-O13              | 2.049(6)  | N2-C12               | 1.343(12) |
| Co1-O15              | 2.043(6)  | N3-C15               | 1.320(13) |
| Co1-O17              | 2.050(6)  | N3-C19               | 1.331(12) |
| Co2-O1               | 2.278(6)  | N4-C35               | 1.330(14) |
| Co2-O3               | 2.111(6)  | N4-C36               | 1.425(14) |
| Co2-O6               | 2.118(6)  | N4-C37               | 1.479(16) |
| Co2-O14              | 2.020(6)  | C1-C2                | 1.381(12) |
| Co2-O21              | 2.131(6)  | C1-C6                | 1.512(12) |
| Co2-N1               | 2.055(7)  | C2-C3                | 1.382(15) |
| Co3-O5               | 2.232(7)  | C3-C4                | 1.391(16) |
| Co3-O7               | 2.197(8)  | C4-C5                | 1.381(13) |
| Co3-O10              | 2.088(8)  | C5-C7                | 1.541(12) |
| Co3-O18              | 2.002(8)  | C8-C9                | 1.385(13) |
| Co3-O19              | 2.052(10) | C8-C13               | 1.524(12) |
| Co3-N2               | 2.051(8)  | C9-C10               | 1.376(15) |
| Co4-O2               | 2.071(6)  | C10-C11              | 1.339(17) |
| Co4-O9               | 2.244(6)  | C11-C12              | 1.400(14) |
| Co4-O11              | 2.109(7)  | C12-C14              | 1.507(15) |
| Co4-O16              | 1.997(6)  | C15-C16              | 1.381(12) |
| Co4-O20              | 2.124(17) | C15-C20              | 1.504(13) |
| Co4-O20A             | 2.199(16) | C16-C17              | 1.388(15) |
| Co4-N3               | 2.050(7)  | C17-C18              | 1.422(15) |
| Co5-O7               | 2.146(8)  | C18-C19              | 1.379(12) |
| Co5-O71              | 2.146(8)  | C19-C21              | 1.521(14) |
| Co5-O22              | 1.980(16) | C22-C23              | 1.422(12) |
| Co5-O22 <sup>1</sup> | 1.980(16) | C22-C27              | 1.352(12) |
| O1-C6                | 1.261(10) | C22-C28              | 1.532(11) |
| O2-C6                | 1.228(10) | C23-C24              | 1.411(11) |
| O3-C7                | 1.256(11) | C24-C25              | 1.375(13) |
| O4-C7                | 1.216(11) | C24-C29              | 1.501(12) |
| O5-C13               | 1.274(11) | C25-C26              | 1.367(13) |
| O6-C13               | 1.233(11) | C26-C27              | 1.380(12) |
| O7-C14               | 1.261(14) | C29-O15 <sup>2</sup> | 1.248(12) |
| O8-C14               | 1.236(16) | C29-O16 <sup>2</sup> | 1.267(11) |
| O9-C20               | 1.271(11) | C30-C31              | 1.383(19) |
| O10-C20              | 1.256(12) | C30-C33              | 1.43(2)   |
| O11-C21              | 1.284(10) | C30-C34              | 1.523(16) |
| O12-C21              | 1.223(12) | C31-C30 <sup>2</sup> | 1.383(19) |

|                      |           |                      |           |
|----------------------|-----------|----------------------|-----------|
| O13-C28              | 1.223(11) | C32-C33 <sup>2</sup> | 1.427(18) |
| O14-C28              | 1.279(10) | C32-C33              | 1.427(18) |
| O15-C29 <sup>2</sup> | 1.248(12) | O23-C38              | 1.07(3)   |
| O16-C29 <sup>2</sup> | 1.267(11) | N5-C38               | 1.14(3)   |
| O17-C34              | 1.240(14) | N5-C39               | 1.57(3)   |
| O18-C34              | 1.230(14) | N5-C40               | 1.34(3)   |
| O21-C35              | 1.270(13) |                      |           |

---

<sup>1</sup>1-Y+X,2-Y,2/3-Z; <sup>2</sup>+Y,+X,-Z

<sup>a</sup> Numbers in parentheses are estimated standard deviations in the least significant digits.

<sup>b</sup> “A” show the atoms from disordered coordinated water molecule.

**Table S5.** Bond Angles (deg) in  $[\text{Co}_8(\text{PDA})_6(\text{PTA})_3(\text{DMF})_2(\text{H}_2\text{O})_4-0.51(\text{Co}(\text{OH})_2)]$ , **2**<sup>a</sup>

|             |          |                           |           |
|-------------|----------|---------------------------|-----------|
| O1-Co1-O5   | 89.0(3)  | C29 <sup>2</sup> -O16-Co4 | 120.7(6)  |
| O9-Co1-O1   | 88.8(2)  | C34-O17-Co1               | 135.7(8)  |
| O9-Co1-O5   | 88.3(2)  | C34-O18-Co3               | 116.9(8)  |
| O13-Co1-O1  | 85.7(2)  | C35-O21-Co2               | 124.4(6)  |
| O13-Co1-O5  | 93.8(2)  | C1-N1-Co2                 | 120.9(6)  |
| O13-Co1-O9  | 174.0(3) | C5-N1-Co2                 | 118.1(6)  |
| O13-Co1-O17 | 90.1(3)  | C5-N1-C1                  | 121.0(7)  |
| O15-Co1-O1  | 95.7(2)  | C8-N2-Co3                 | 120.6(6)  |
| O15-Co1-O5  | 175.0(3) | C8-N2-C12                 | 120.7(8)  |
| O15-Co1-O9  | 90.2(3)  | C12-N2-Co3                | 118.6(7)  |
| O15-Co1-O13 | 88.2(3)  | C15-N3-Co4                | 120.9(6)  |
| O15-Co1-O17 | 87.6(3)  | C15-N3-C19                | 121.5(8)  |
| O17-Co1-O1  | 174.5(3) | C19-N3-Co4                | 117.2(6)  |
| O17-Co1-O5  | 87.8(3)  | C35-N4-C36                | 123.3(9)  |
| O17-Co1-O9  | 95.6(3)  | C35-N4-C37                | 120.7(10) |
| O3-Co2-O1   | 149.7(2) | C36-N4-C37                | 115.9(11) |
| O3-Co2-O6   | 95.3(3)  | N1-C1-C2                  | 120.6(8)  |
| O3-Co2-O21  | 90.8(2)  | N1-C1-C6                  | 114.6(7)  |
| O6-Co2-O1   | 84.7(2)  | C2-C1-C6                  | 124.8(8)  |
| O6-Co2-O21  | 173.9(3) | C1-C2-C3                  | 118.4(9)  |
| O14-Co2-O1  | 112.5(2) | C2-C3-C4                  | 120.2(9)  |
| O14-Co2-O3  | 97.8(2)  | C5-C4-C3                  | 118.1(9)  |
| O14-Co2-O6  | 88.4(3)  | N1-C5-C4                  | 121.3(8)  |
| O14-Co2-O21 | 90.3(2)  | N1-C5-C7                  | 113.0(7)  |
| O14-Co2-N1  | 173.1(3) | C4-C5-C7                  | 125.7(8)  |
| O21-Co2-O1  | 90.3(2)  | O1-C6-C1                  | 114.6(7)  |
| N1-Co2-O1   | 73.5(2)  | O2-C6-O1                  | 127.7(8)  |
| N1-Co2-O3   | 76.2(3)  | O2-C6-C1                  | 117.7(7)  |
| N1-Co2-O6   | 88.9(3)  | O3-C7-C5                  | 113.8(7)  |
| N1-Co2-O21  | 93.1(3)  | O4-C7-O3                  | 128.3(9)  |
| O7-Co3-O5   | 149.3(3) | O4-C7-C5                  | 117.7(8)  |
| O10-Co3-O5  | 86.8(3)  | N2-C8-C9                  | 120.9(9)  |
| O10-Co3-O7  | 90.0(3)  | N2-C8-C13                 | 114.4(8)  |
| O18-Co3-O5  | 113.2(3) | C9-C8-C13                 | 124.6(9)  |
| O18-Co3-O7  | 97.3(3)  | C10-C9-C8                 | 118.5(10) |
| O18-Co3-O10 | 90.0(4)  | C11-C10-C9                | 120.5(10) |
| O18-Co3-O19 | 90.6(4)  | C10-C11-C12               | 119.7(10) |
| O18-Co3-N2  | 172.5(3) | N2-C12-C11                | 119.6(10) |
| O19-Co3-O5  | 92.4(3)  | N2-C12-C14                | 114.2(9)  |

|                           |           |                                        |           |
|---------------------------|-----------|----------------------------------------|-----------|
| O19-Co3-O7                | 90.6(4)   | C11-C12-C14                            | 126.1(9)  |
| O19-Co3-O10               | 179.1(4)  | O5-C13-C8                              | 113.8(8)  |
| N2-Co3-O5                 | 74.2(3)   | O6-C13-O5                              | 128.8(8)  |
| N2-Co3-O7                 | 75.4(3)   | O6-C13-C8                              | 117.4(8)  |
| N2-Co3-O10                | 91.4(3)   | O7-C14-C12                             | 115.3(9)  |
| N2-Co3-O19                | 88.2(4)   | O8-C14-O7                              | 126.5(11) |
| O2-Co4-O9                 | 88.5(3)   | O8-C14-C12                             | 118.2(11) |
| O2-Co4-O11                | 89.9(3)   | N3-C15-C16                             | 121.3(9)  |
| O2-Co4-O20                | 171.8(10) | N3-C15-C20                             | 113.3(7)  |
| O2-Co4-O20A               | 172.6(10) | C16-C15-C20                            | 125.2(9)  |
| O11-Co4-O9                | 150.8(2)  | C15-C16-C17                            | 118.3(10) |
| O11-Co4-O20               | 85.3(9)   | C16-C17-C18                            | 120.1(8)  |
| O11-Co4-O20A              | 96.5(8)   | C19-C18-C17                            | 116.5(9)  |
| O16-Co4-O2                | 90.1(3)   | N3-C19-C18                             | 122.2(9)  |
| O16-Co4-O9                | 108.7(3)  | N3-C19-C21                             | 114.5(7)  |
| O16-Co4-O11               | 100.4(3)  | C18-C19-C21                            | 123.3(9)  |
| O16-Co4-O20               | 84.2(7)   | O9-C20-C15                             | 116.5(8)  |
| O16-Co4-O20A              | 92.4(6)   | O10-C20-O9                             | 126.1(8)  |
| O16-Co4-N3                | 174.0(3)  | O10-C20-C15                            | 117.4(8)  |
| O20-Co4-O9                | 98.9(10)  | O11-C21-C19                            | 113.4(8)  |
| O20A-Co4-O9               | 84.1(10)  | O12-C21-O11                            | 127.4(9)  |
| N3-Co4-O2                 | 95.2(3)   | O12-C21-C19                            | 119.2(8)  |
| N3-Co4-O9                 | 74.3(3)   | C23-C22-C28                            | 116.1(7)  |
| N3-Co4-O11                | 76.8(3)   | C27-C22-C23                            | 121.5(8)  |
| N3-Co4-O20                | 90.2(7)   | C27-C22-C28                            | 122.4(8)  |
| N3-Co4-O20A               | 82.7(6)   | C24-C23-C22                            | 117.8(8)  |
| O7-Co5-O71                | 119.1(6)  | C23-C24-C29                            | 118.8(8)  |
| O221-Co5-O71              | 107.3(5)  | C25-C24-C23                            | 118.5(8)  |
| O221-Co5-O7               | 115.9(5)  | C25-C24-C29                            | 122.7(7)  |
| O22-Co5-O7                | 107.3(5)  | C26-C25-C24                            | 122.4(8)  |
| O22-Co5-O71               | 115.9(5)  | C25-C26-C27                            | 119.8(8)  |
| O22 <sup>1</sup> -Co5-O22 | 87.3(10)  | C22-C27-C26                            | 119.9(8)  |
| Co1-O1-Co2                | 104.3(3)  | O13-C28-O14                            | 123.2(7)  |
| C6-O1-Co1                 | 136.0(5)  | O13-C28-C22                            | 121.0(7)  |
| C6-O1-Co2                 | 116.3(5)  | O14-C28-C22                            | 115.8(7)  |
| C6-O2-Co4                 | 128.5(6)  | O15 <sup>2</sup> -C29-O16 <sup>2</sup> | 126.4(8)  |
| C7-O3-Co2                 | 118.6(6)  | O15 <sup>2</sup> -C29-C24              | 117.5(8)  |
| Co1-O5-Co3                | 105.6(3)  | O16 <sup>2</sup> -C29-C24              | 116.0(8)  |
| C13-O5-Co1                | 133.0(6)  | C31-C30-C33                            | 119.7(15) |
| C13-O5-Co3                | 116.9(5)  | C31-C30-C34                            | 121.8(14) |
| C13-O6-Co2                | 126.2(6)  | C33-C30-C34                            | 117.1(14) |

|                           |          |                           |           |
|---------------------------|----------|---------------------------|-----------|
| Co5-O7-Co3                | 143.1(4) | C30 <sup>2</sup> -C31-C30 | 122(2)    |
| C14-O7-Co3                | 116.3(7) | C33-C32-C33 <sup>2</sup>  | 120(2)    |
| C14-O7-Co5                | 100.1(7) | C32-C33-C30               | 118.9(16) |
| Co1-O9-Co4                | 107.0(3) | O17-C34-C30               | 116.3(10) |
| C20-O9-Co1                | 136.2(6) | O18-C34-O17               | 127.1(10) |
| C20-O9-Co4                | 114.4(6) | O18-C34-C30               | 116.1(11) |
| C20-O10-Co3               | 130.2(6) | O21-C35-N4                | 122.2(9)  |
| C21-O11-Co4               | 117.8(6) | C38-N5-C39                | 123(2)    |
| C28-O13-Co1               | 132.9(6) | C38-N5-C40                | 124(3)    |
| C28-O14-Co2               | 113.9(5) | C40-N5-C39                | 112(2)    |
| C29 <sup>2</sup> -O15-Co1 | 136.3(6) | O23-C38-N5                | 122(3)    |

---

<sup>1</sup>1-Y+X,2-Y,2/3-Z; <sup>2</sup>+Y,+X,-Z

<sup>a</sup> Numbers in parentheses are estimated standard deviations in the least significant digits.

<sup>b</sup> “A” show the atoms from disordered coordinated water molecule.



**Table S6.** The calculated values through the bond valence sum analysis<sup>56</sup>

| Cobalt atoms in<br>Complex <b>1</b> | bond valence sum | Cobalt atoms in<br>Complex <b>2</b> | bond valence sum |
|-------------------------------------|------------------|-------------------------------------|------------------|
| Co1                                 | 2.02             | Co1                                 | 2.00             |
| Co2                                 | 1.97             | Co2                                 | 2.00             |
| Co3                                 | 2.06             | Co3                                 | 2.06             |
| Co4                                 | 2.02             | Co4                                 | 2.07             |
|                                     |                  | Co5                                 | 1.44             |

Figure S1. ORTEP drawing of **1** with 30% probability thermal ellipsoids.

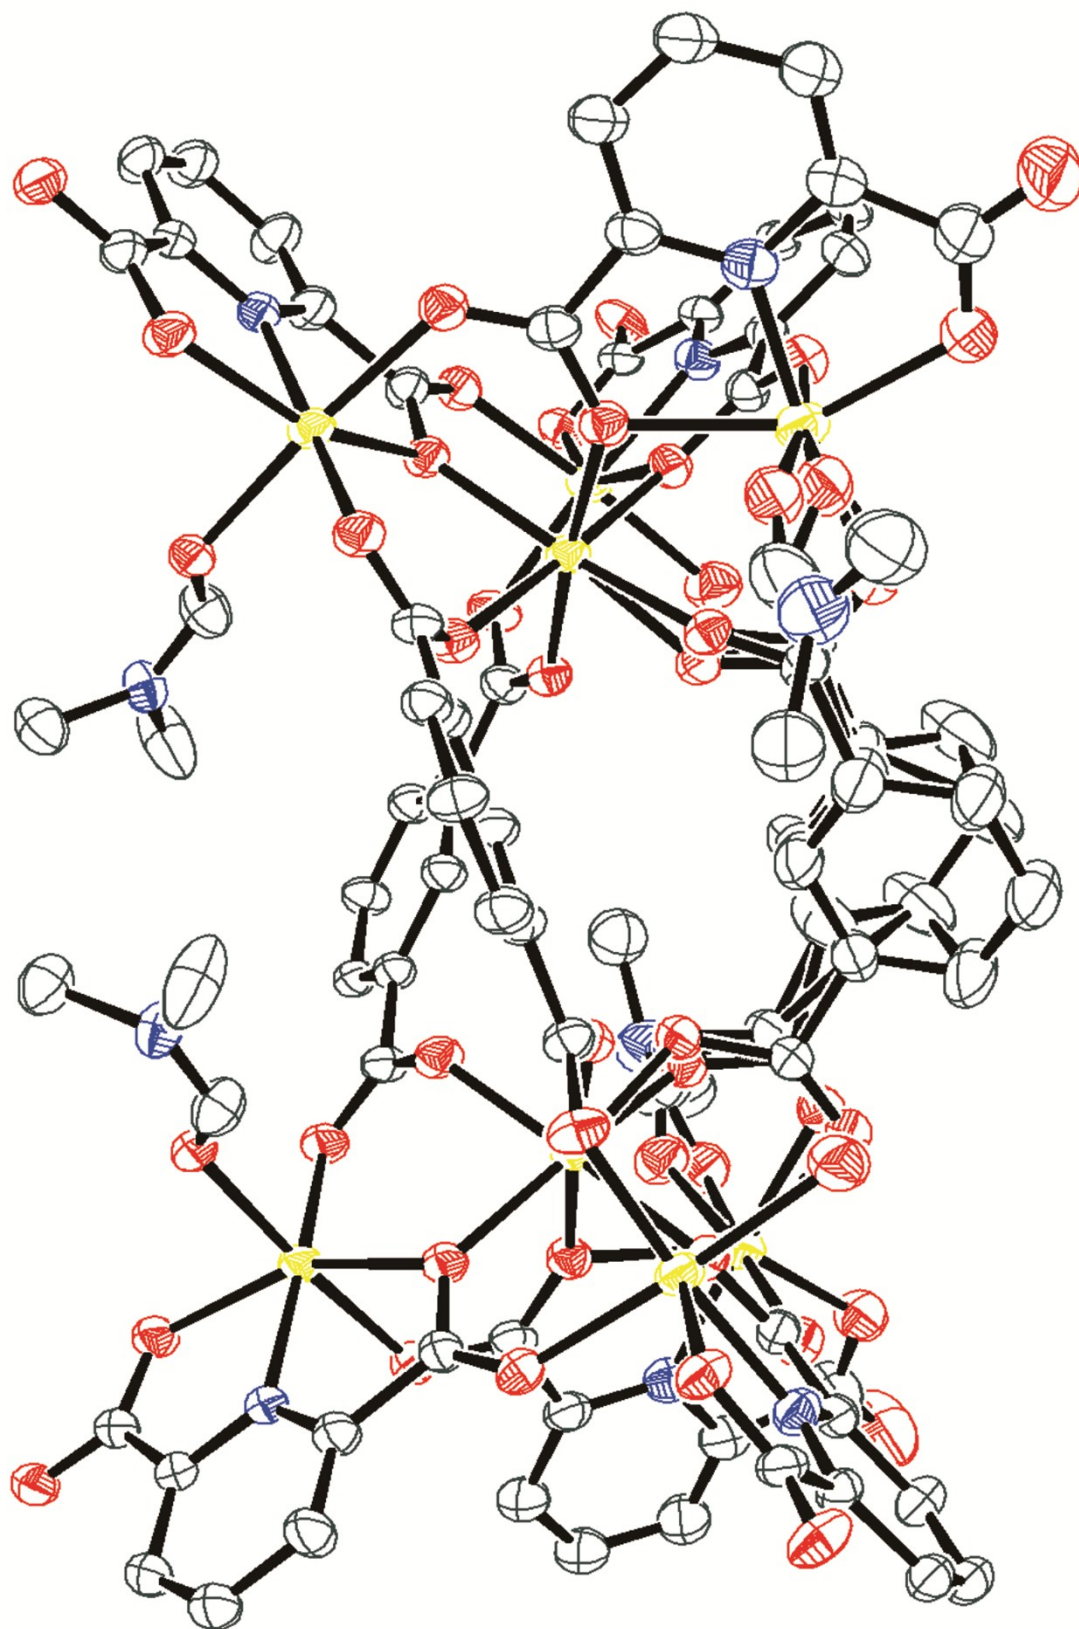

Figure S2. ORTEP drawing of **2** with 30% probability thermal ellipsoids.

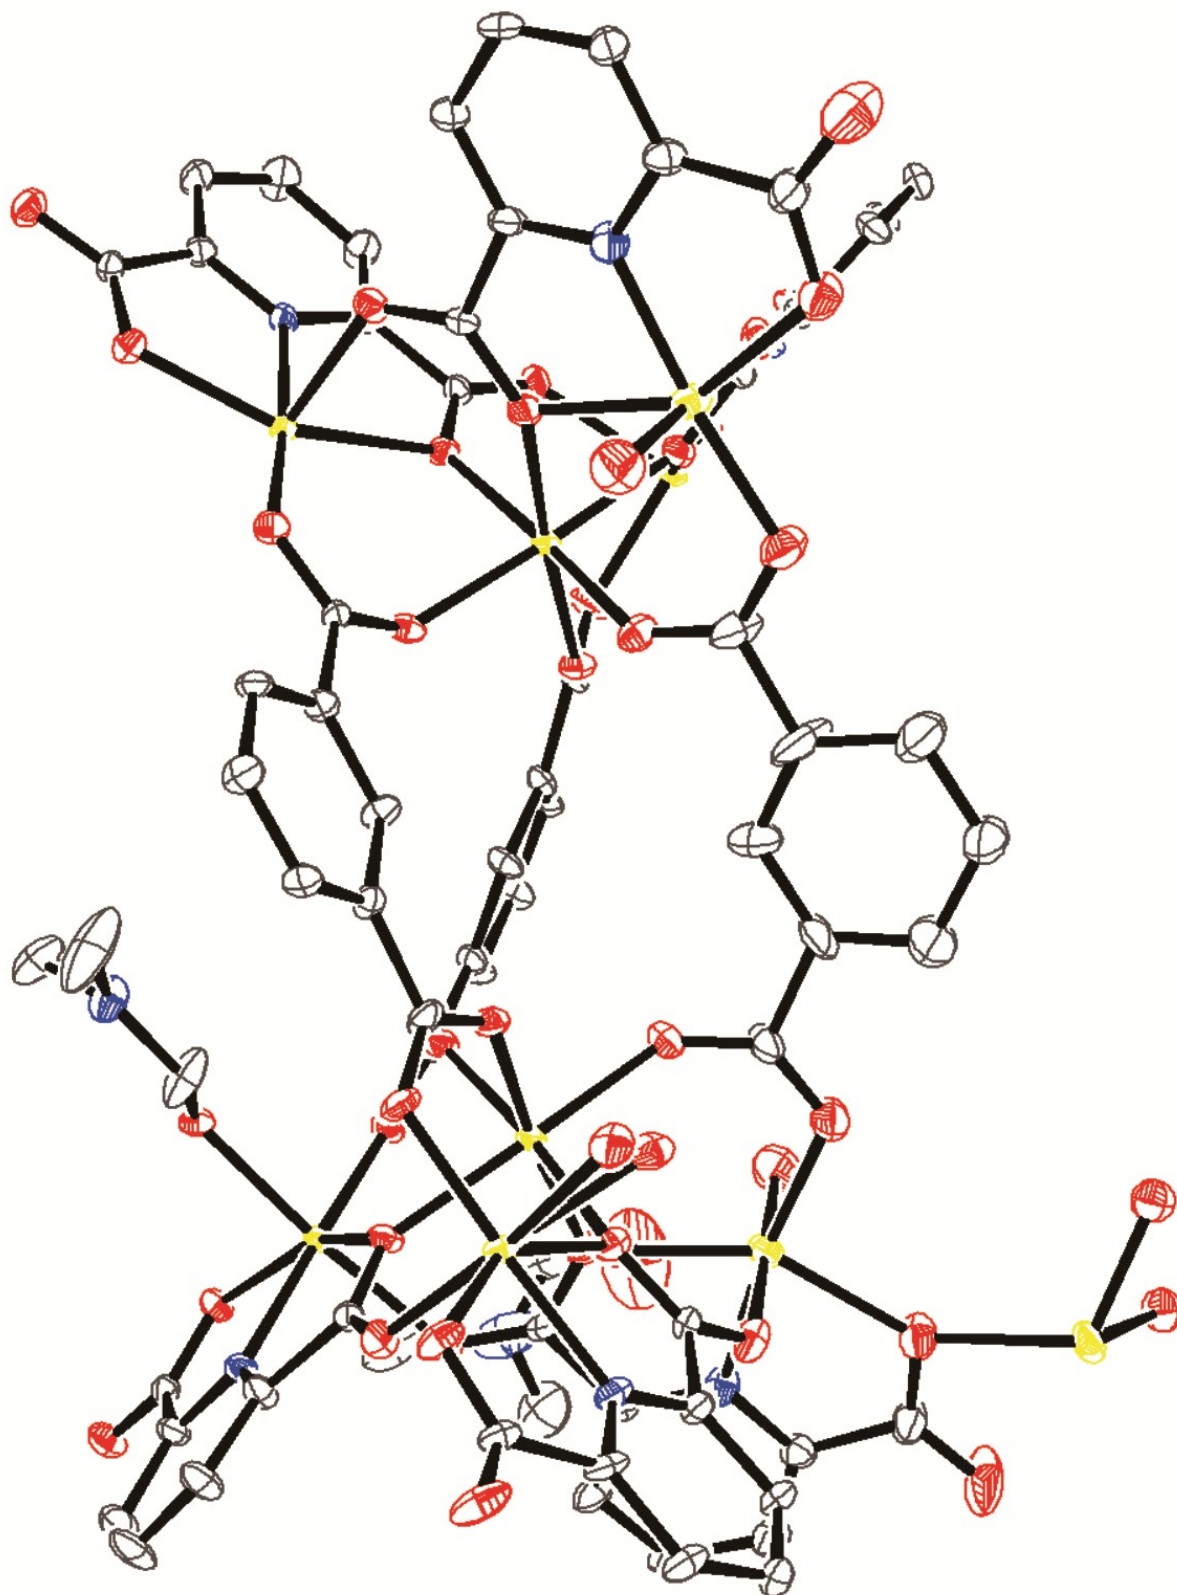

**Figure S3.** Thermogravimetric analysis (TGA) for  $\text{Co}_8(\text{PDA})_6(\text{PTA})_3(\text{DMF})_2(\text{H}_2\text{O})_4$ , **1**.

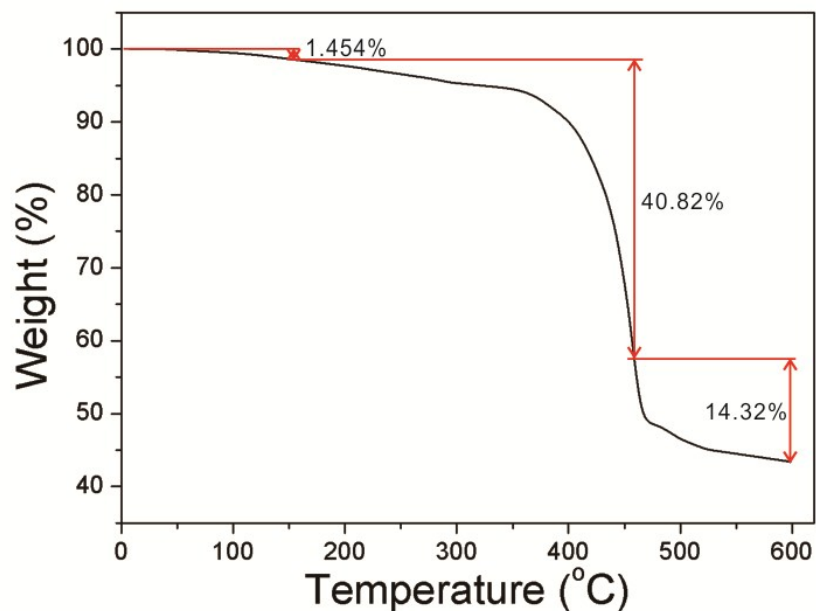

**Figure S4.** Thermogravimetric analysis (TGA) for  $[\text{Co}_8(\text{PDA})_6(\text{PTA})_3(\text{DMF})_2(\text{H}_2\text{O})_4 \cdot 0.51(\text{Co}(\text{OH})_2)]$ , **2**

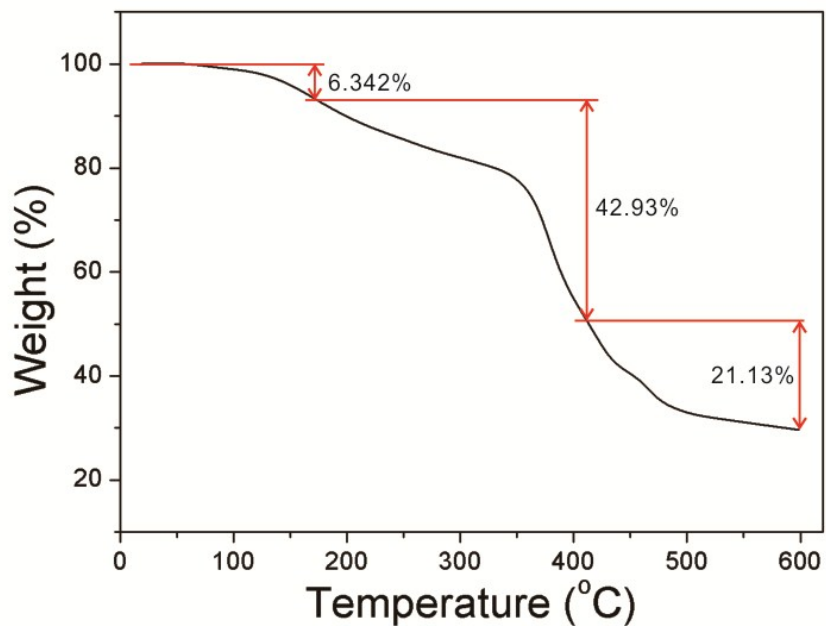

**Figure S5.** FT-IR spectrum for  $\text{Co}_8(\text{PDA})_6(\text{PTA})_3(\text{DMF})_2(\text{H}_2\text{O})_4$ , **1**.

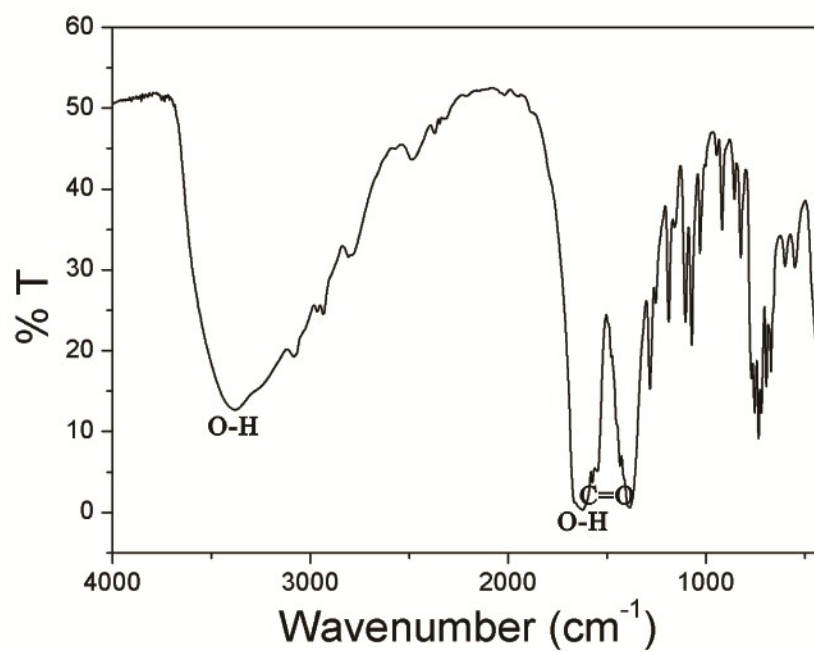

**Figure S6.** FT-IR spectrum for  $[\text{Co}_8(\text{PDA})_6(\text{PTA})_3(\text{DMF})_2(\text{H}_2\text{O})_4-0.51(\text{Co}(\text{OH})_2)]$ , **2**.

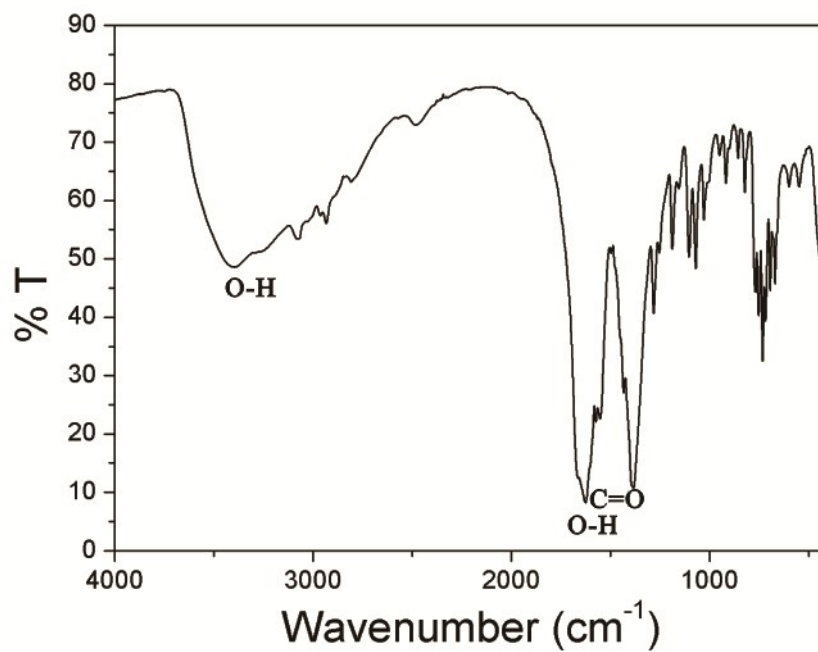

**Figure S7.** PXRD pattern for  $\text{Co}_8(\text{PDA})_6(\text{PTA})_3(\text{DMF})_2(\text{H}_2\text{O})_4$ , **1**: simulated (a) and experimental (b).

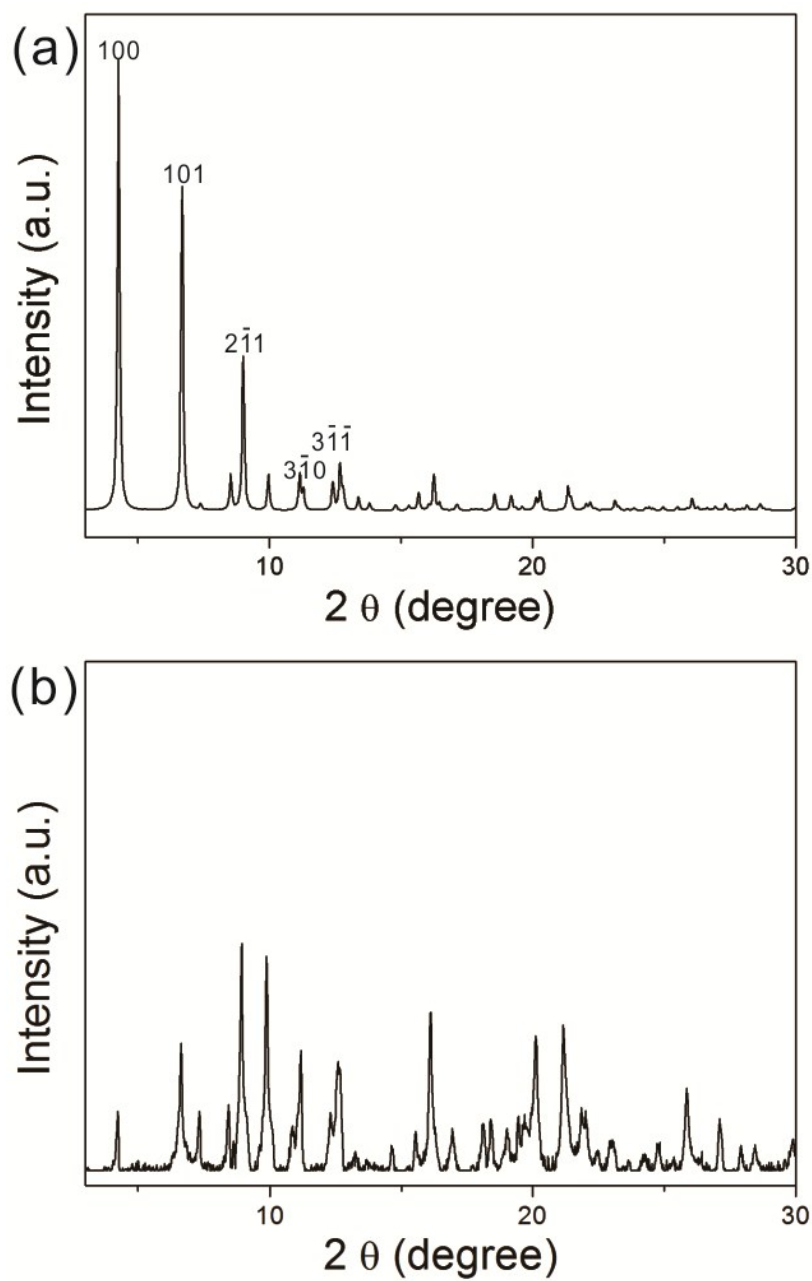

**Figure S8.** PXRD pattern for  $[\text{Co}_8(\text{PDA})_6(\text{PTA})_3(\text{DMF})_2(\text{H}_2\text{O})_4-0.51(\text{Co}(\text{OH})_2)]$ , **2**: simulated (a) and experimental (b).

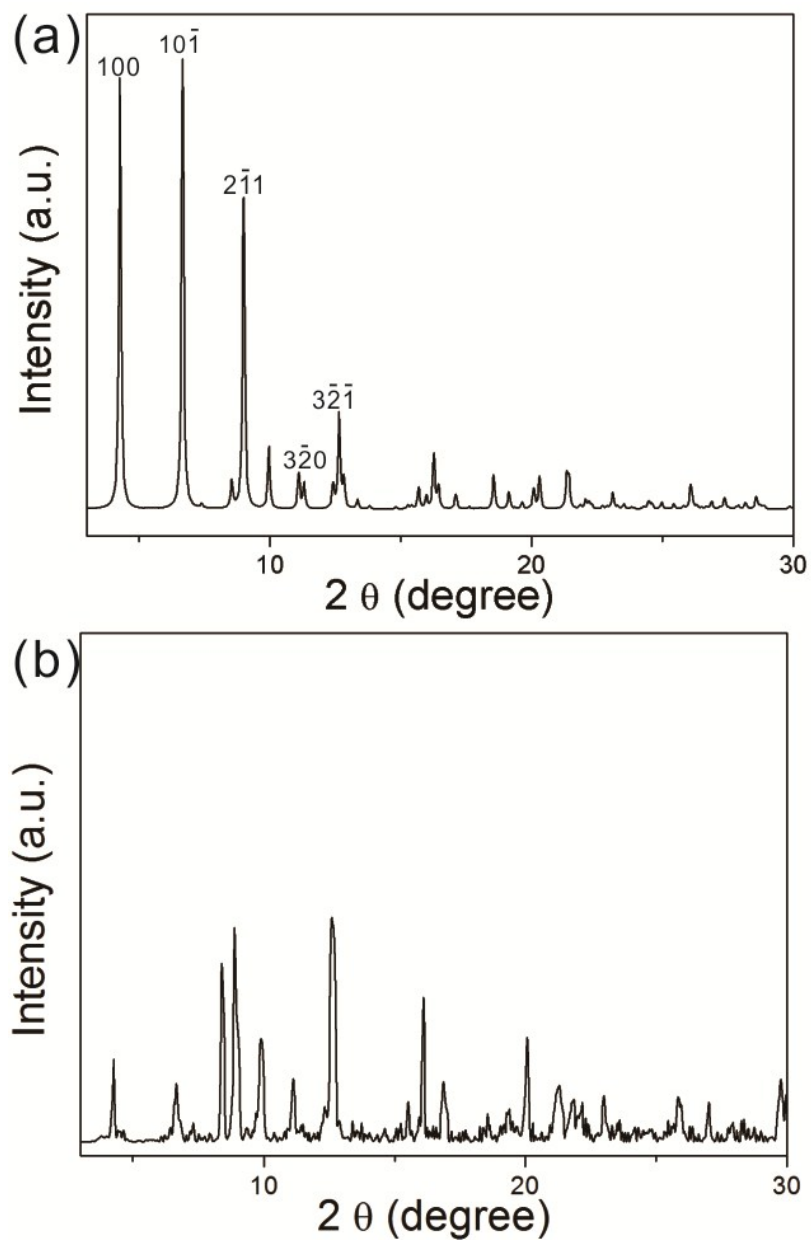

**Figure S9.** UV-Vis spectra of **1** and **2**

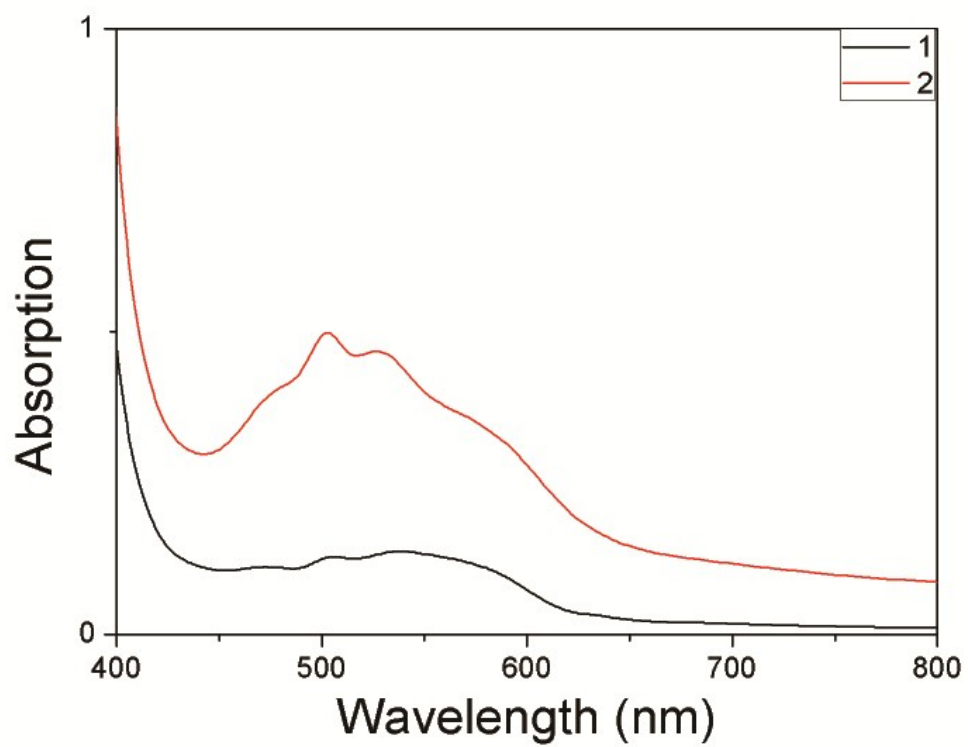



## Supporting Information References:

<sup>1</sup> *APEX2 (version 2012.2-0)*, Data collection software, Bruker AXS Inc., Madison, Wisconsin, (2011).

<sup>2</sup> *SAINTE (version 6.0)*, Data integration software, Bruker AXS Inc., Madison, Wisconsin, (2011).

<sup>3</sup> G. M. Sheldrick, *version 2.05 SADABS, Program for absorption correction with the Bruker SMART system*, Universitat Göttingen, Germany (2011).

<sup>4</sup> G. M. Sheldrick, *SHELXL-93, Program for the refinement of crystal structures*, Universitat Göttingen, Germany (2004).

<sup>5</sup> G. J. Palenik, *Inorg. Chem.* 1997, **36**, 122.

<sup>6</sup> M. O'Keeffe and N. E. Brese, *J. Am. Chem. Soc.* 1991, **113**, 3226-3229.
